# Supplementary material
Source: publisher site journal article supplement (https://www.dovepress.com/get_supplementary_file.php?f=291014.xlsx)
Supplement: Supplementary file 1 [file get_supplementary_file.php]

## Sheet: Sheet1
Supplementary File 1. Research Data
No	Age	BMI	Histology Grade	T	N	M	Stage	CK5/6(I)	EFGR(I)	P53(I)	miRNA-223	Last Follow Up Status	Duration (days)	Chemotherapy Regimen
1	49.663	27.3	0	3	0	0	IIB	-	+	+	25.99	Alive	1113	Non-Platinum
2	37.7699	21.9138	0	2	0	0	IIA	+	+	-	97	Deceased	693	Platinum
3	60.074	25.96	0	3	2	0	IIIA	-	-	-	29.85	Deceased	867	Non-Platinum
4	56.2548	24.52	2	4	2	0	IIIB	+	-	+	21.11	Alive	1264	Platinum
5	50.1425	35.5	2	4	0	0	IIIB	-	-	-	16	Alive	1105	Platinum
6	56.7452	21.7777	3	4	2	0	IIIB	+	-	+	24.29	Deceased	563	Non-Platinum
7	32.463	19.7368	3	4	1	0	IIIB	-	+	+	64	Deceased	233	Non-Platinum
8	54.8603	26.9531	3	3	2	0	IIIA	-	-	+	34.29	Deceased	366	Platinum
9	41.3945	20.8116	3	3	1	0	IIIA	+	+	-	48.5	Deceased	564	N.A
10	42.5041	26.058	3	4	2	0	IIIB	+	+	+	32	Deceased	935	Platinum
11	60.937	29.2	0	4	1	0	IIIB	-	-	+	19.69	Alive	1193	Platinum
12	77.1315	22.5	2	2	0	0	IIA	+	+	-	21.11	Deceased	554	Non-Platinum
13	34.5507	18.7304	2	4	2	0	IIIB	-	-	-	29.85	Alive	1618	Platinum
14	50.0192	29.78	0	4	1	0	IIIB	+	-	-	22.62	Alive	1573	Non-Platinum
15	58.7452	18.662	3	4	2	0	IIIB	+	+	-	24.25	Deceased	483	Platinum
16	65.4137	20.5507	3	2	0	0	IIA	-	+	+	29.85	Alive	1113	Platinum
17	47.8986	27.69	3	4	2	0	IIIB	+	-	-	22.62	Deceased	428	Non-Platinum
18	50.8301	24.8888	3	4	2	0	IIIB	+	+	-	48.5	Alive	1193	Platinum
19	41.0521	23.1481	3	4	1	0	IIIB	+	-	-	25.99	Deceased	764	Platinum
20	51.0219	22.9874	3	2	3	0	IIIC	-	-	+	22.62	Deceased	1380	Platinum
21	57.7342	23	3	4	2	1	IV	-	-	-	36.75	Deceased	1242	Non-Platinum
22	50.2082	29.1666	0	4	2	0	IIIB	-	-	-	21.11	Alive	1242	Non-Platinum
23	61.8712	26.6389	3	3	0	0	IIB	-	-	-	18.37	Alive	1092	Non-Platinum
24	56.5507	24.456	2	4	0	0	IIIB	-	-	-	29.85	Deceased	450	Non-Platinum
25	67.8658	16.09	0	2	0	0	IIA	+	+		27.85	Alive	1200	Non-Platinum
26	72.1452	29.42	2	3	0	0	IIB	+	+	+	32	Deceased	1056	N.A
27	38.2575	24.3	3	4	1	1	IV	+	+	-	29.85	Deceased	472	Platinum
28	64.1205	26.6667	0	3	1	1	IV	-	-	-	25.99	Deceased	493	Platinum
29	41.1479	20.9876	3	2	1	0	IIB	-	+	-	27.85	Alive	2149	Non-Platinum
30	58.9808	23.9	3	4	2	0	IIIB	-	-	-	18.37	Alive	1177	Non-Platinum
31	36.8959	31.2175	3	2	0	0	IIA	-	-	-	16	Alive	1230	Non-Platinum
32	54.5644	23.7	3	3	2	0	IIIA	-	-	-	14.92	Alive	1442	Non-Platinum
33	39.9781	14	3	2	1	1	IV	+	+	+	25.99	Deceased	645	Platinum
34	63.4411	26.3	2	3	0	1	IV	-	-	-	21.11	Deceased	411	Non-Platinum
35	50.9151	24.7	3	2	0	0	IIA	+	+	-	25.99	Alive	2163	Non-Platinum
36	45.4192	25	3	4	0	0	IIIB	+	+	+	16	Deceased	533	Non-Platinum
37	31.7342	24	3	4	0	0	IIIB	+	+	+	9.18	Deceased	462	Non-Platinum
38	42.9534	18.2615	3	3	2	0	IIIA	-	-	+	18.37	Alive	1517	Platinum
39	46.1644	33.7325	3	4	1	1	IV	-	-	+	34.29	Deceased	551	Non-Platinum
40	50.2849	29.2968	2	4	1	0	IIIB	-	-	+	32	Alive	2101	Non-Platinum
41	55.4986	21.9478	2	4	3	0	IIIC	+	+	+	27.85	Deceased	720	Non-Platinum
42	60.83	16.4195	3	2	1	0	IIB	+	+	+	19.69	Alive	1978	Platinum
43	42.6712	27.1929	3	2	1	1	IV	+	+	+	24.25	Alive	1253	Platinum
44	34.3096	30.2631	0	3	2	0	IIIA	+	+	-	42.22	Deceased	891	Non-Platinum
45	63.0932	21.5	0	4	1	0	IIIB	+	+	-	22.62	Alive	1311	Platinum
46	47.9534	20	3	4	1	0	IIIB	+	+	-	19.69	Deceased	627	Platinum
47	62.7808	18.7305	3	1	2	0	IIIA	+	+	-	29.85	Deceased	672	Platinum
48	54.5644	23.74	3	3	2	0	IIIA	+	+	+	36.75	Deceased	683	Non-Platinum
49	38.8822	24.8889	2	3	2	0	IIIA	+	+	-	24.25	Deceased	451	Non-Platinum
50	48.3342	20.9	3	4	0	1	IV	+	+	+	36.75	Deceased	548	Platinum
51	48.7014	18.7	2	2	0	0	IIA	+	+	-	25.99	Alive	2158	Non-Platinum
52	68.9726	22	3	3	0	0	IIB	+	+	-	17.14	Alive	1793	Platinum
53	40.2274	21	3	4	1	0	IIIB	-	+	+	27.85	Deceased	418	Non-Platinum
